# Supplementary material
Source: publisher figshare collection journal article supplement (https://frontiersin.figshare.com/ndownloader/files/12418289)
Supplement: Supplementary file [file 12418289]

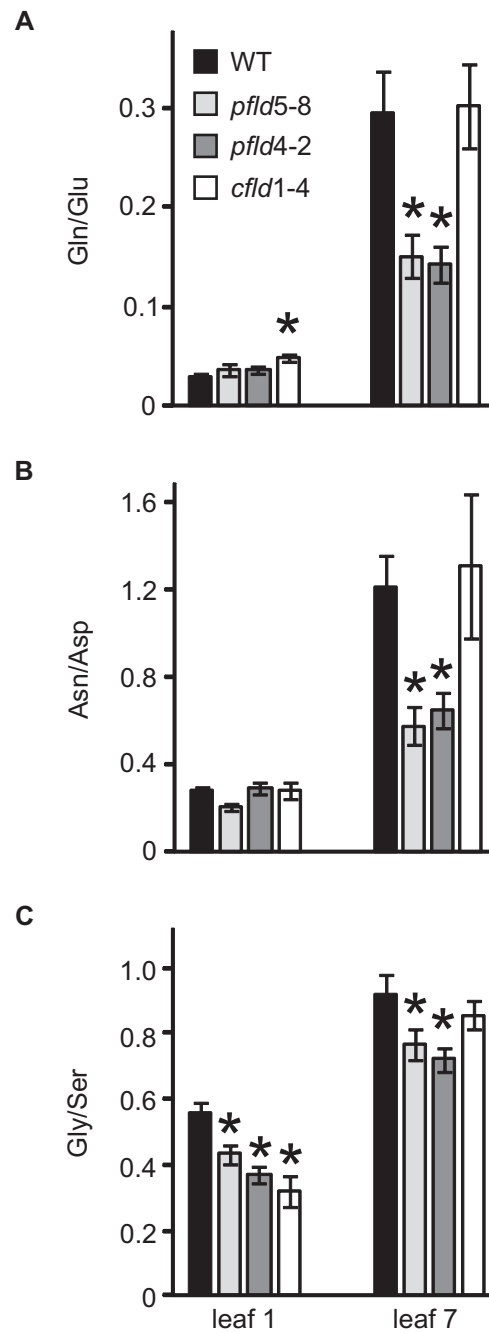

**Supplementary Figure S9.** Fld expression in chloroplasts differentially affected the levels of amino acids related to N mobilization and photorespiration in ageing tobacco leaves. Ratios of Gln to Glu (A), Asn to Asp (B) and Gly to Ser (C) were calculated for leaves 1 and 7 of WT, *pfld* and *cfl* plants. Details on amino acid determinations in leaf extracts are given in Materials and Methods. Data reported are means  $\pm$  SE (n = 8-10). Asterisks indicate values significantly different from the corresponding leaf of WT plants ( $P < 0.05$ ) using ANOVA.
